# Supplementary material for: Beneficial effect of voluntary physical exercise in Plakophilin2 transgenic mice
Source: PubMed Central journal article supplement (PMC8177441; doi:10.1371/journal.pone.0252649), 2021-06-04

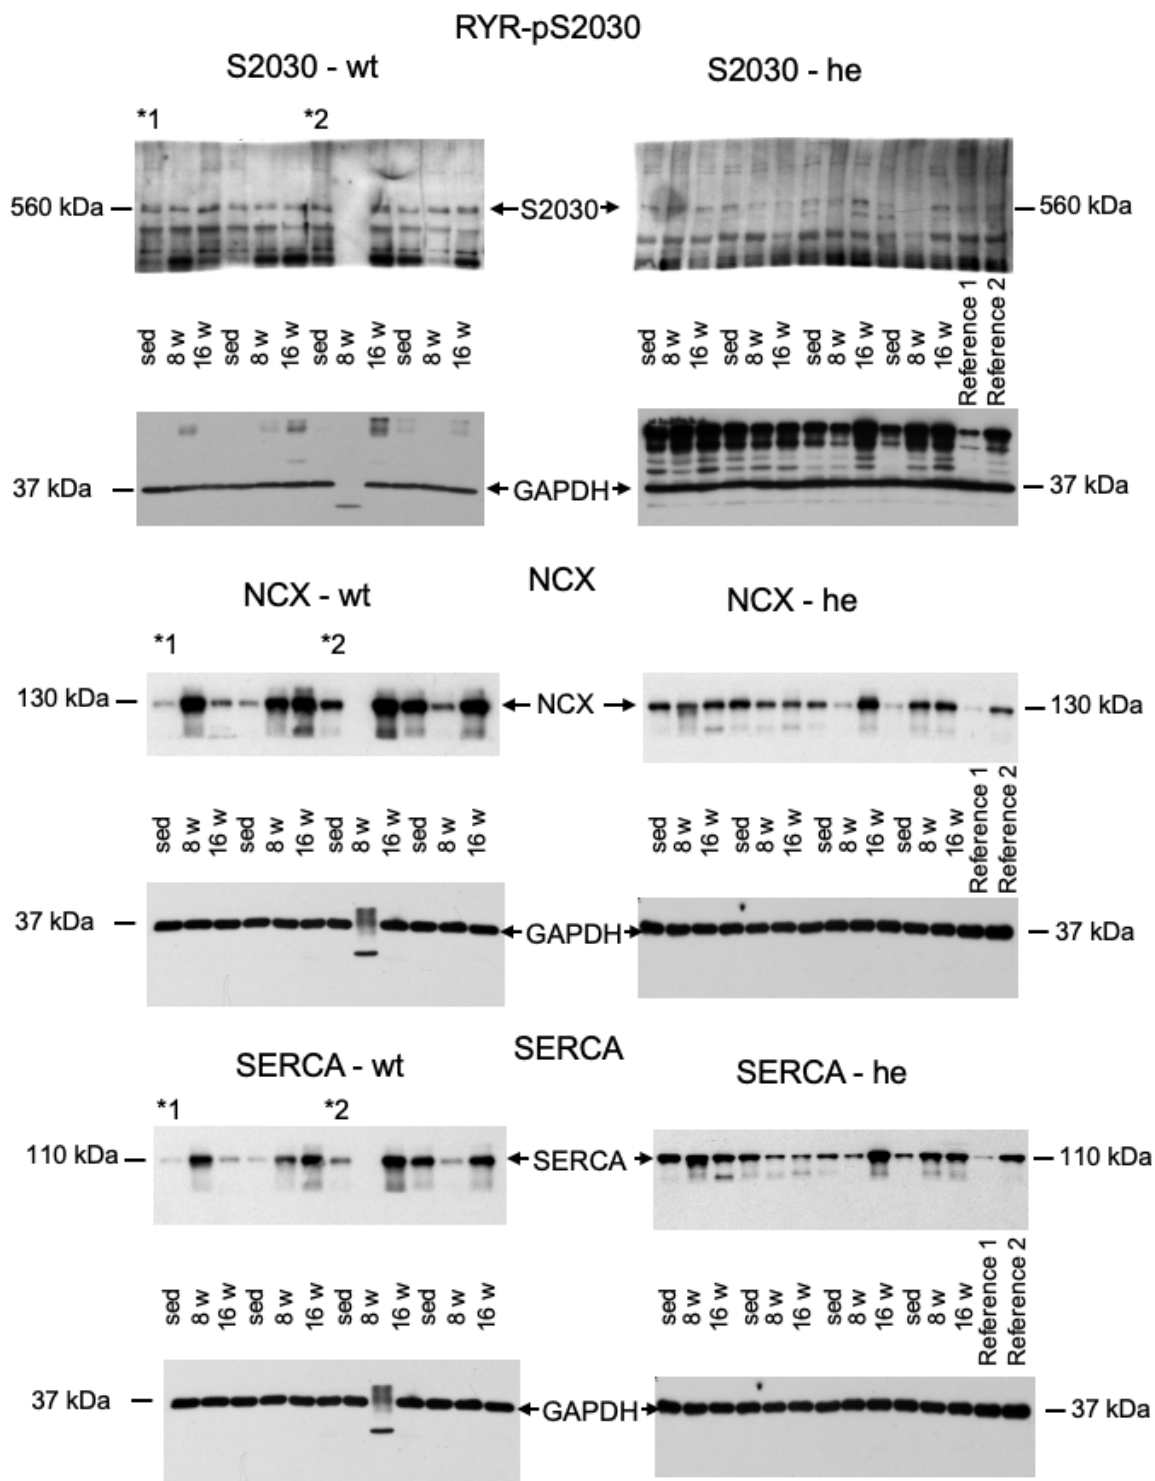

### Phospholamban

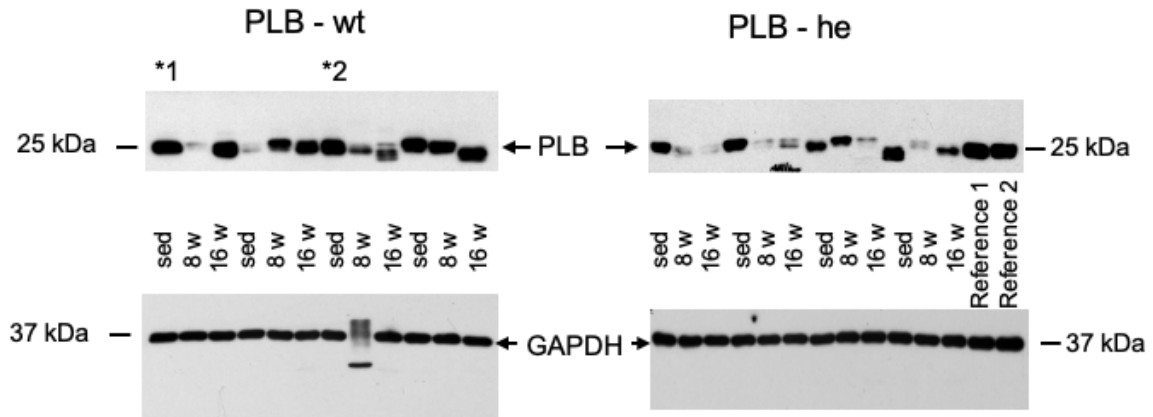

### Phospholamban-pT17

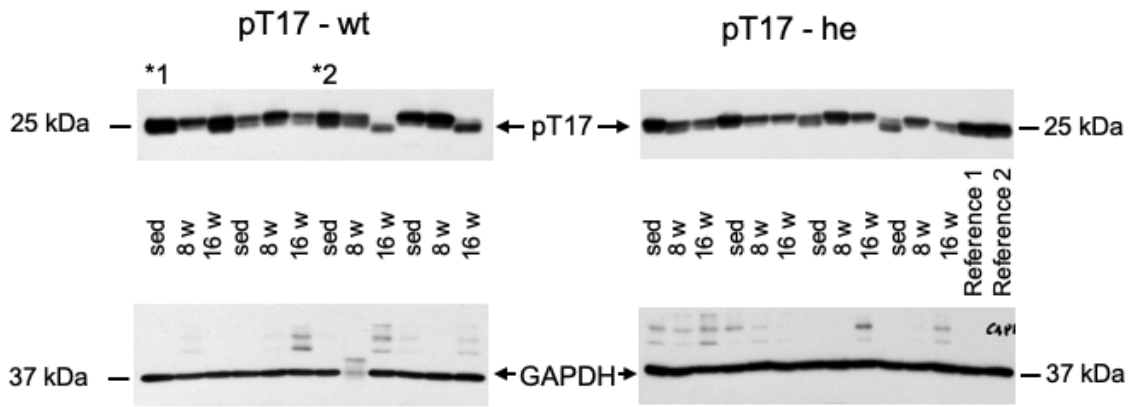

### Phospholamban-pS16

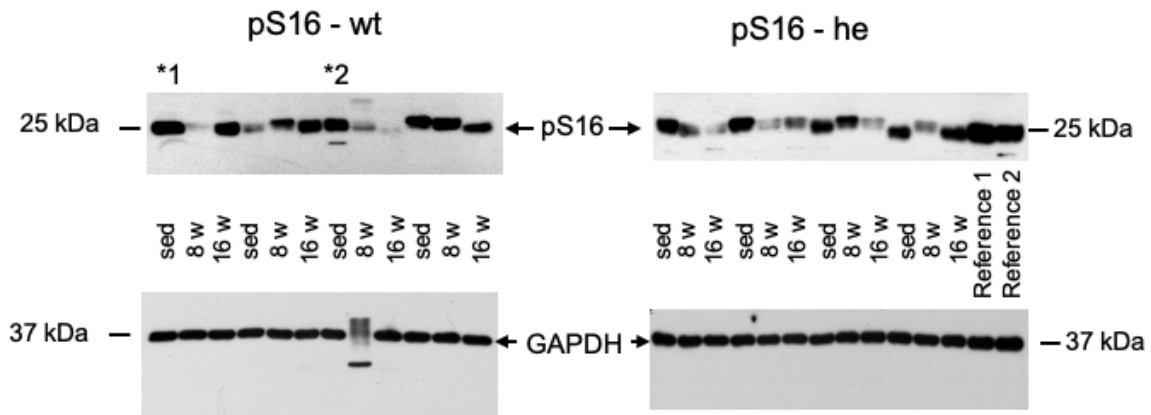

Supplement: pone.0252649.s002.pdf [file pone.0252649.s002.pdf]
